# Supplementary material for: Mutational signature analyses in multi-child families reveal sources of age-related increases in human germline mutations
Source: PubMed Central journal article supplement (PMC11541588; doi:10.1038/s42003-024-07140-2), 2024-11-06
Supplement: 42003_2024_7140_MOESM2_ESM.pdf [file 42003_2024_7140_MOESM2_ESM.pdf]

# Supplementary Tables and Figures

## **Mutational signature analyses in multi-child families suggest a key role for DNA mismatch repair in human germline *de novo* mutations**

Shojaeisaadi HA<sup>1</sup>, Schoenrock A<sup>1,#</sup>, Meier MJ<sup>1</sup>, Williams A<sup>1</sup>, Norris JM<sup>2</sup>, Palmer ND<sup>3</sup>,  
Yauk CL<sup>4</sup>, Marchetti F<sup>1,\*</sup>

**(1)** Environmental Health Science and Research Bureau, Health Canada, Ottawa, ON, Canada

**(2)** Department of Epidemiology, Colorado School of Public Health, University of Colorado  
Anschutz Medical Campus, Aurora, CO, USA,

**(3)** Department of Biochemistry, Wake Forest School of Medicine, Winston-Salem, NC, USA,

**(4)** Department of Biology, University of Ottawa, Ottawa, Ontario, Canada.

#Present address: Research Computing Services, Carleton University, Ottawa, ON, Canada

\* Corresponding author.

Dr. Francesco Marchetti

Environmental Health Science and Research Bureau

Health Canada

251 Sir Frederick Banting Driveway,

Ottawa, ON, K1A 0K9

Canada

Email: francesco.marchetti@hc-sc.gc.ca

Tel: +1 (613) 794-1407

Submitted to Communications Biology

28 **Supplementary Table 1.** Difference in paternal age at first and last child

| <b>IRASFS</b>                                |                    | <b>Paternal Age (years)</b> |                   |
|----------------------------------------------|--------------------|-----------------------------|-------------------|
| <b>Family ID</b>                             | <b>First Child</b> | <b>Last Child</b>           | <b>Difference</b> |
| 1                                            | 22.7               | 28.6                        | 5.9               |
| 2                                            | 24.5               | 31.2                        | 6.7               |
| 3                                            | 24.5               | 38.2                        | 13.7              |
| 4                                            | 24.9               | 30.4                        | 5.5               |
| 5                                            | 17.5               | 20.2                        | 2.7               |
| 6                                            | 24.4               | 31.3                        | 6.9               |
| 7                                            | 16.0               | 21.8                        | 5.8               |
| 8                                            | 24.1               | 36.8                        | 12.7              |
| 9                                            | 16.4               | 22.3                        | 5.9               |
| 10                                           | 25.0               | 41.2                        | 16.2              |
| 11                                           | 26.1               | 40.7                        | 14.5              |
| 12                                           | 21.1               | 35.9                        | 14.8              |
| 13                                           | 24.7               | 34.0                        | 9.3               |
|                                              |                    | <b>Average</b>              | <b>9.3</b>        |
| <b>First and last child difference (yrs)</b> |                    | <b>Median</b>               | <b>6.9</b>        |
|                                              |                    | <b>Minimum</b>              | <b>2.7</b>        |
|                                              |                    | <b>Maximum</b>              | <b>16.2</b>       |

29

30

31 **Supplementary Table 2.** Cosine similarity values of reconstructed signatures by individual  
 32 families

| <u>Mutational Signatures Database</u> |               |                     |                       |
|---------------------------------------|---------------|---------------------|-----------------------|
| <u>Family</u>                         | <u>COSMIC</u> | <u>Germline</u>     | <u>DNA repair KOs</u> |
| <u>IRASFS 1</u>                       | <u>0.813</u>  | <b><u>0.656</u></b> | <b><u>0.769</u></b>   |
| <u>IRASFS 2</u>                       | <u>0.860</u>  | <b><u>0.712</u></b> | <u>0.805</u>          |
| <u>IRASFS 3</u>                       | <u>0.904</u>  | <u>0.810</u>        | <u>0.805</u>          |
| <u>IRASFS 4</u>                       | <u>0.906</u>  | <b><u>0.795</u></b> | <u>0.805</u>          |
| <u>IRASFS 5</u>                       | <u>0.880</u>  | <u>0.811</u>        | <b><u>0.782</u></b>   |
| <u>IRASFS 6</u>                       | <u>0.886</u>  | <b><u>0.735</u></b> | <b><u>0.786</u></b>   |
| <u>IRASFS 7</u>                       | <u>0.867</u>  | <b><u>0.769</u></b> | <u>0.816</u>          |
| <u>IRASFS 8</u>                       | <u>0.915</u>  | <b><u>0.729</u></b> | <u>0.828</u>          |
| <u>IRASFS 9</u>                       | <u>0.878</u>  | <b><u>0.754</u></b> | <b><u>0.766</u></b>   |
| <u>IRASFS 10</u>                      | <u>0.938</u>  | <b><u>0.795</u></b> | <u>0.842</u>          |
| <u>IRASFS 11</u>                      | <u>0.935</u>  | <u>0.830</u>        | <u>0.824</u>          |
| <u>IRASFS 12</u>                      | <u>0.866</u>  | <u>0.831</u>        | <u>0.839</u>          |
| <u>IRASFS 13</u>                      | <u>0.954</u>  | <u>0.850</u>        | <u>0.853</u>          |

33 Bold indicates cosine similarity values below 0.8

34

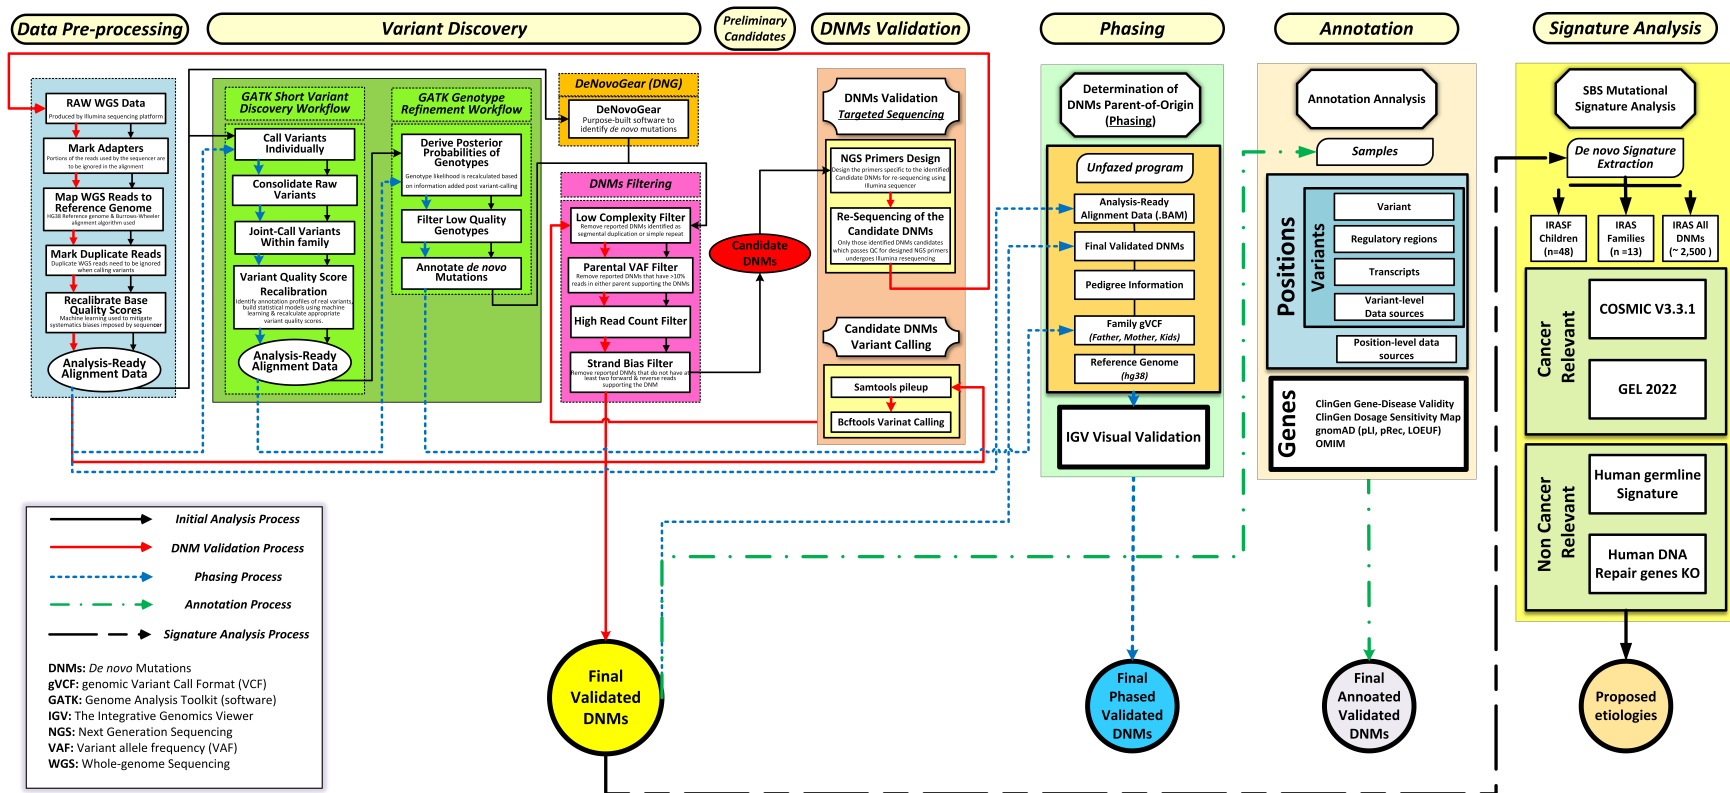

37 **Figure S1. The bioinformatic workflow.** Overall bioinformatics pipeline for SNV identification, validation and subsequent parent-of-  
 38 origin phasing, annotations and mutational signature analysis.

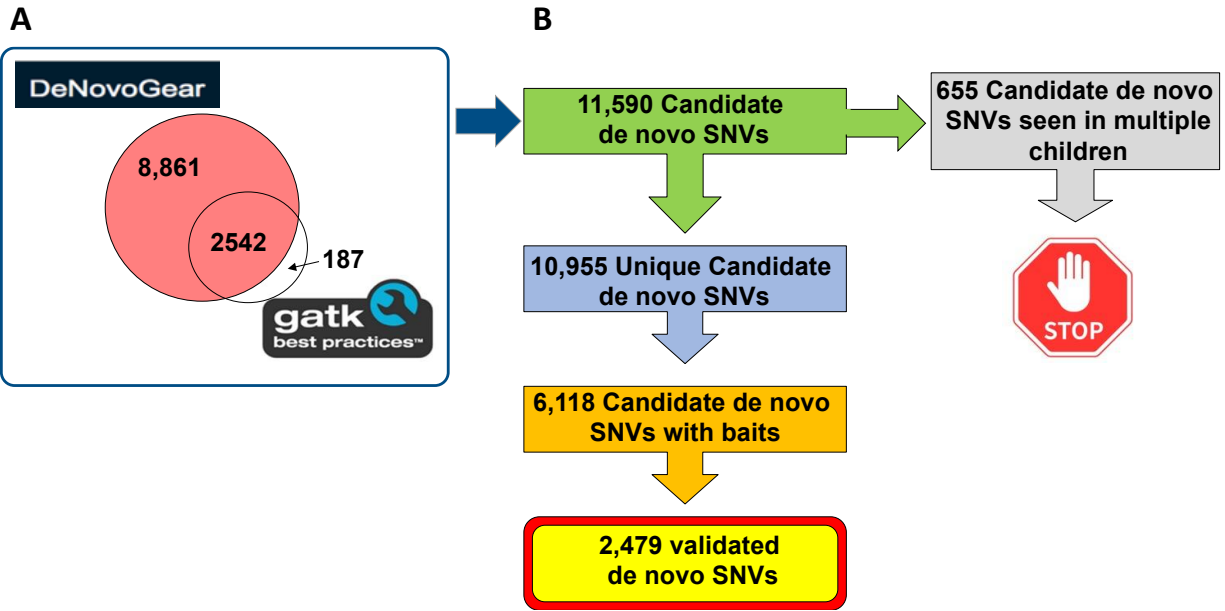

39

40 **Figure S2. Process for identifying de novo single nucleotide variants (SNVs).** (A) Venn diagram  
 41 showing the numbers of candidate SNVs identified by DeNovoGear and GATK. (B) Overall,  
 42 11,590 unique SNVs were identified. The 655 candidate SNVs that were identified in several  
 43 children were eliminated from further analysis generating a set of 10,955 unique candidate  
 44 SNVs. Baits were successfully designed for 6,118 (~56%) candidate SNVs. Targeted  
 45 resequencing of this set generated 2,479 SNVs that were successfully validated after applying  
 46 the necessary filtering and QC during data processing.

47

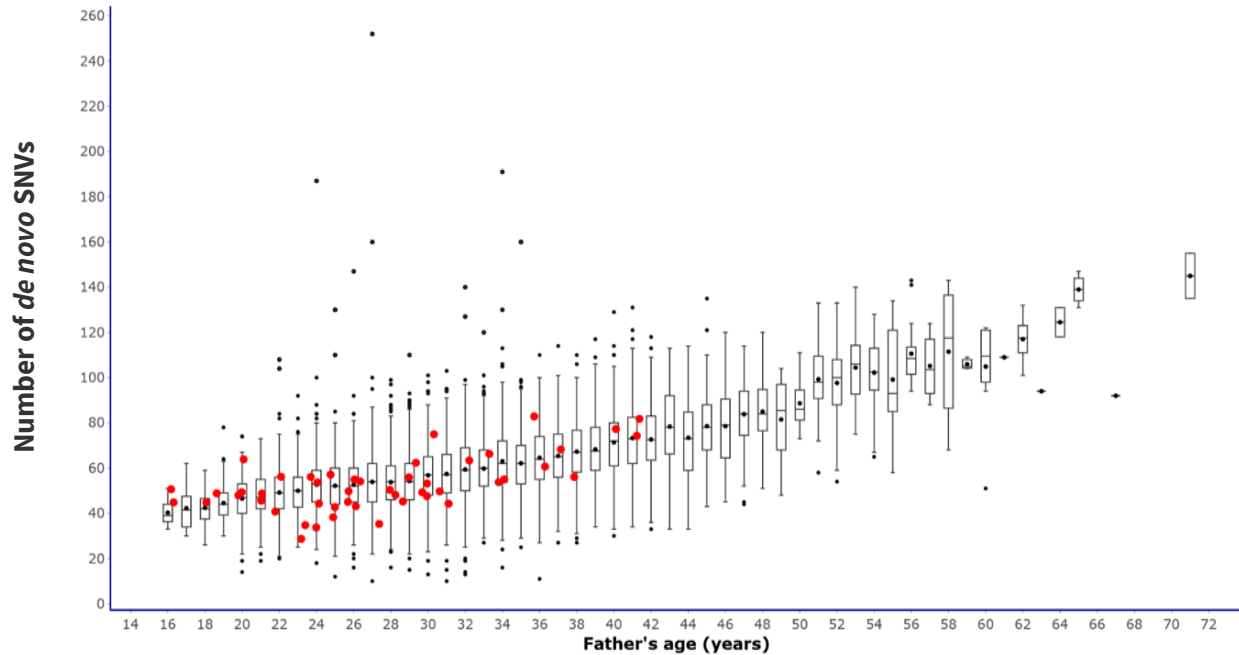

48

49 **Figure S3. Comparison of *de novo* SNVs in the IRASFS cohort with other studies.** Box plot  
 50 distribution of the SNVs by paternal age from a dataset from 12\* published trio studies with >  
 51 11,000 probands. The red dots show the number of validated SNVs for each of the 48 IRASFS  
 52 probands.

53 \* References: Michaelson *et al.*, Cell 2012 Dec 21;151(7):1431-42; Kong *et al.*, Nature 2012 Aug  
 54 23;488(7412):471-5; Dijk *et al.*, Nat Genet. 2014 Aug;46(8):818-25; Wang *et al.*, Cell Res. 2021  
 55 Aug;31(8):919-928; Rahbari *et al.*, Nat Genet. 2016 Feb;48(2):126-133; Jónsson *et al.*, Nature.  
 56 2017 Sep 28;549(7673):519-522; Kessler *et al.*, PNAS. 2020 Feb 4;117(5):2560-2569;  
 57 Halldorsson *et al.*, Science. 2019 Jan 25;363(6425):eaau1043; Sasani *et al.*, Elife. 2019 Sep  
 58 24;8:e46922; Goldman *et al.*, Nat Genet. 2018 Apr;50(4):487-492; Goldman *et al.*, Nat Genet.  
 59 2016 Aug;48(8):935-9; Wilfert *et al.*, Nat Genet. 2021 Aug;53(8):1125-1134.

60

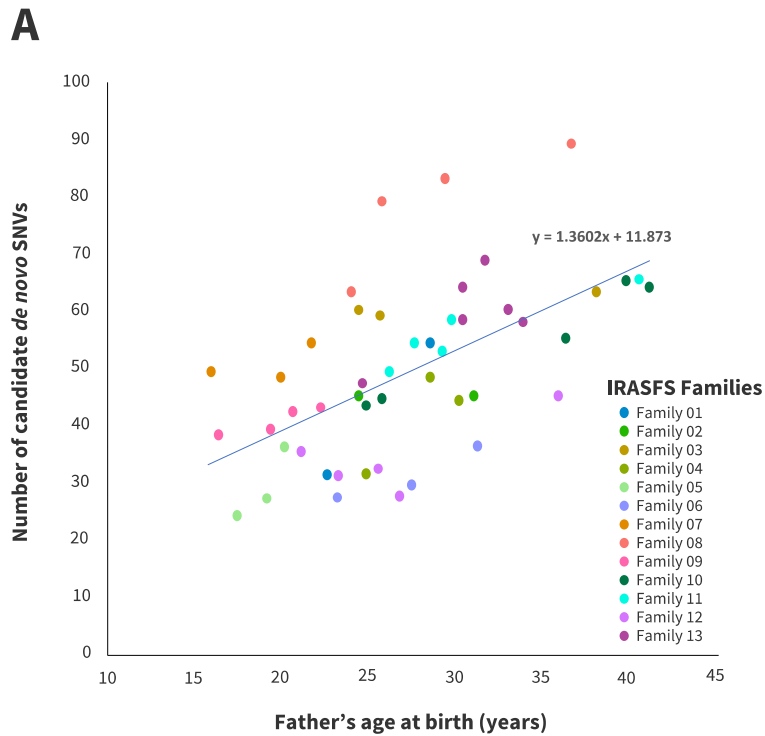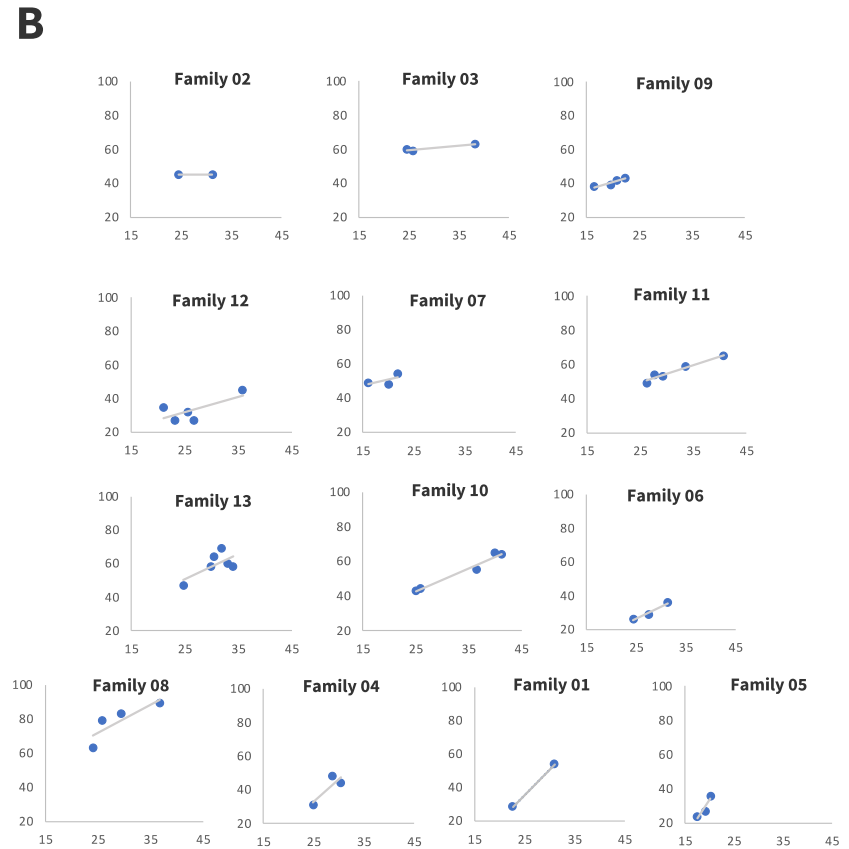

61

62

63 **Figure S4. The distribution of candidate *de novo* SNVs identified by both GATK and DenovoGear in the IRASFS multi-child**  
 64 **families and their correlation with paternal age. (A)** The scatter plot represents the number of candidate *de novo* SNVs in each of  
 65 the 48 children by paternal age at the time of birth. Each color represents a specific IRASFS family. The blue line represents the slope  
 66 of all candidate *de novo* SNVs. **(B)** Scatter plots of the numbers of candidate *de novo* SNVs for each family relative to the father's age  
 67 at each child's birth, ordered by slope from the lowest (top left corner, IRASFS Family 02) to the highest rate (bottom right corner

68 color, IRASFS Family 05). Regression lines and 95% confidence intervals indicate the predicted number of candidate *de novo* SNVs as  
69 a function of paternal age using a Poisson regression.

70

71



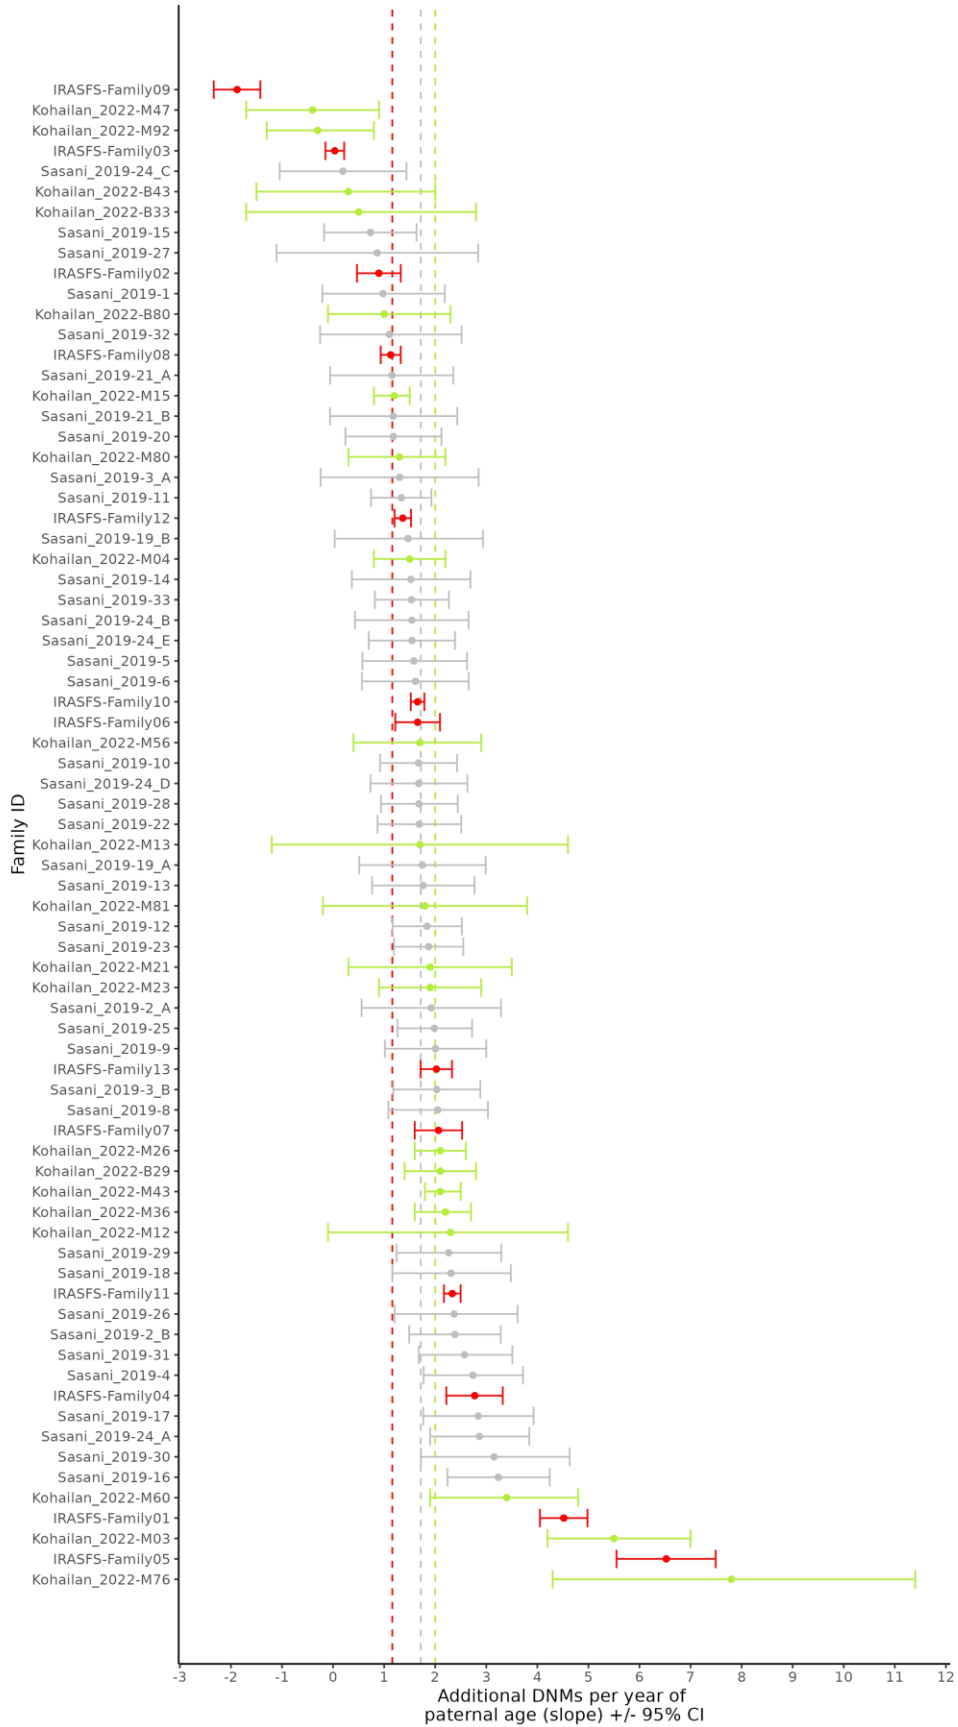

73 **Figure S5. Comparison of paternal age effects among multi-sibling families from diverse**  
74 **ethnic backgrounds.** Slope  $\pm$  95% confidence interval (CI) of the IRASFS cohort (red) compared  
75 with the CEPH/Utah multi-sibling families (Sasani *et al.*, 2019; gray) and Middle-East multiplex  
76 families (Kohailan *et al.*, 2022; green). Each family is sorted in order of increasing slope. Dashed  
77 vertical lines indicate the combined paternal age effect based on all families within a study,  
78 with colours representing the corresponding cohorts: 1.29 de novo SNVs/year, 95% CI: 1.44-  
79 1.57,  $p < 0.0001$  for IRASFS (red); 1.72 de novo SNVs/year, 95% CI: 1.58–1.85,  $p < 2e-16$  for the  
80 CEPH/Utah (grey); and, 1.36 de novo SNVs/year, 95% CI: 1.11–1.61,  $p = 1 \times 10^{-22}$  for Middle-  
81 East multiplex families cohort (green).

82
