# Supplementary material for: Mutational signature analyses in multi-child families reveal sources of age-related increases in human germline mutations
Source: PubMed Central journal article supplement (PMC11541588; doi:10.1038/s42003-024-07140-2), 2024-11-06
Supplement: 42003_2024_7140_MOESM3_ESM.pdf [file 42003_2024_7140_MOESM3_ESM.pdf]

## Description of Additional Supplementary Files

**File name:** Supplementary Data 1

**Description:** The file contains nine tabs. The titles and description of each tab are: Figure 2: Complete list of validated SNVs by proband. Figure 3: Validated SNVs with intercept and slope data Figure 4: Validated SNVs by parent of origin Figure 5A: 96-trinucleotide spectrum for SNVs identified in all children from this study Figure 5B: 96-trinucleotide spectrum for SNVs from children born from the youngest fathers (33.1 years of age) Figure 6A: Percentages of each of the 96 trinucleotides for signature reconstruction using the COSMIC database Figure 6B: Percentages of each of the 96 trinucleotides for signature reconstruction using the Germline database Figure 6C: Percentages of each of the 96 trinucleotides for signature reconstruction using the DNA repair KO database
